# Supplementary material for: DBU and TU synergistically induced ring-opening polymerization of phosphate esters: a mechanism study
Source: Royal Society of Chemistry journal article supplement (doi:10.1039/d0nj05422d), 2020-12-18
Supplement: d0nj05422d2.pdf [file d0nj05422d2.pdf]

Electronic Supplementary Material (ESI) for New Journal of Chemistry. This journal is © The Royal Society of Chemistry and the Centre National de la Recherche Scientifique 2020

## Electronic Supplementary Information for the Manuscript:

# DBU and TU Synergistically Induced Ring-Opening Polymerization of Phosphate Esters: A Mechanism Study

Shuang Li,<sup>a</sup> Han Lu,<sup>a</sup> Xiaohui Kang,<sup>\*b</sup> Pan Wang<sup>a</sup> and Yi Luo<sup>\*a</sup>

<sup>a</sup>State Key Laboratory of Fine Chemicals, School of Chemical Engineering, Dalian University of Technology, Dalian 116024, China

<sup>b</sup>College of Pharmacy, Dalian Medical University, Dalian, Liaoning 116044, China

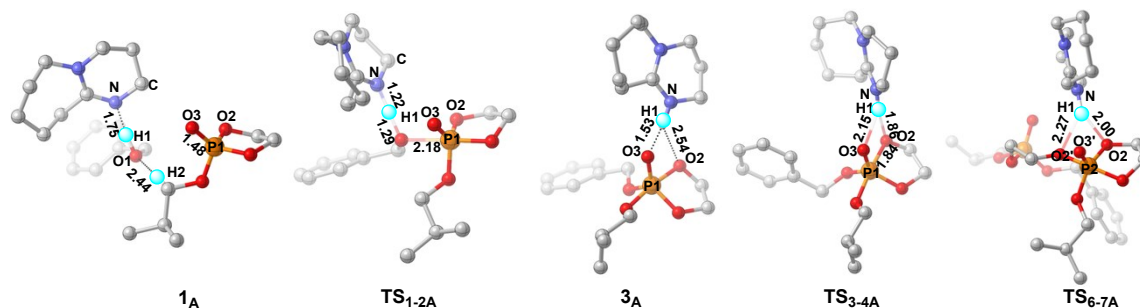

**Fig. S1** Optimized structures (distances in Å) of key intermediates and transition states for ROP of *i*BP catalyzed by binary DBU/BnOH.

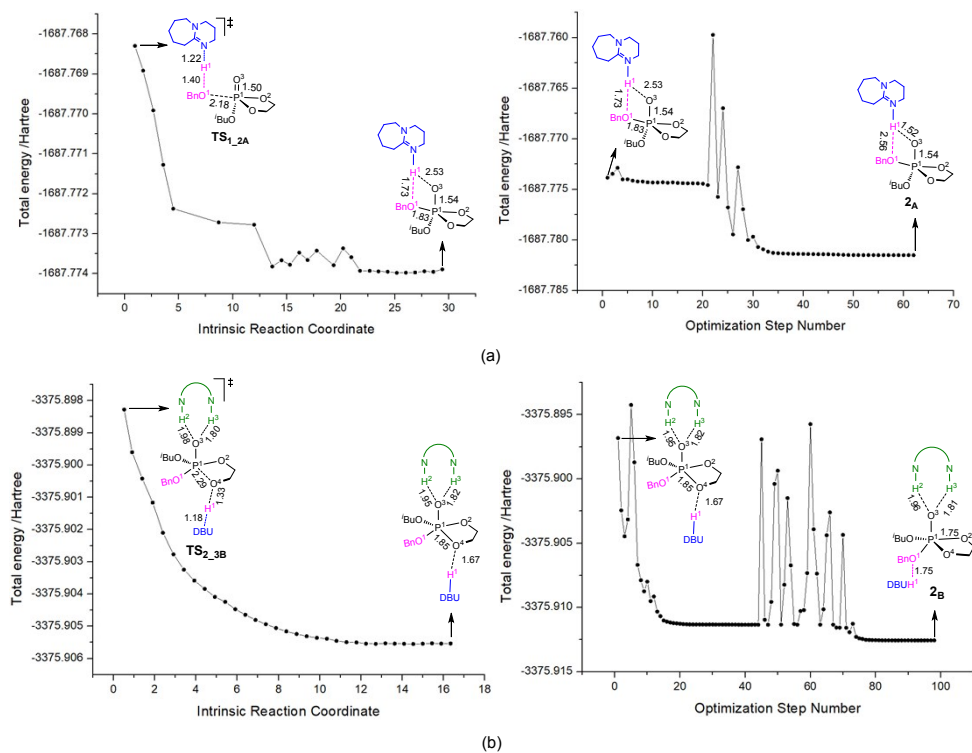

**Fig. S2** (a) IRC following of TS<sub>1\_2A</sub> and the optimization curve of 2<sub>A</sub>. (b) IRC following of TS<sub>2\_3B</sub> and the optimization curve of 2<sub>B</sub>.

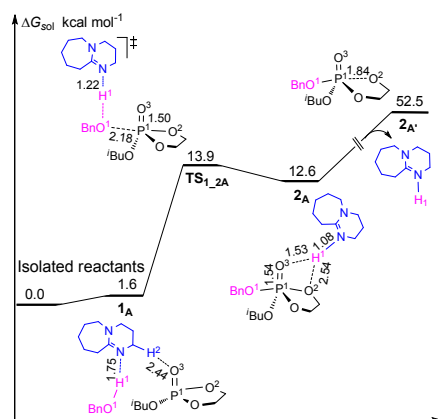

**Fig. S3** The potential energy surface of DBUH<sup>+</sup> departure from 2<sub>A</sub>.

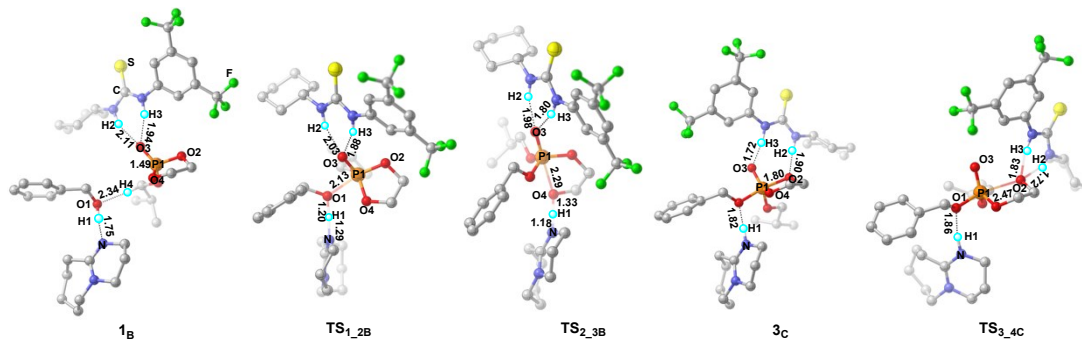

**Fig. S4** Optimized structures (distances in Å) of key intermediates and transition states for ROP of *i*BP catalyzed by ternary DBU/TU/BnOH.

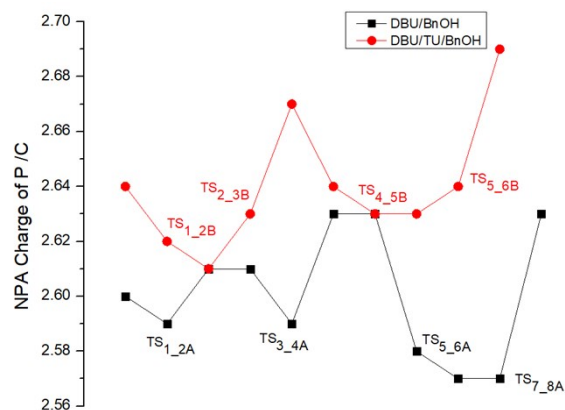

**Fig. S5** NPA charge on P atom of *i*BP in binary DBU/BnOH (black curve) and ternary DBU/TU/BnOH (red curve) systems.

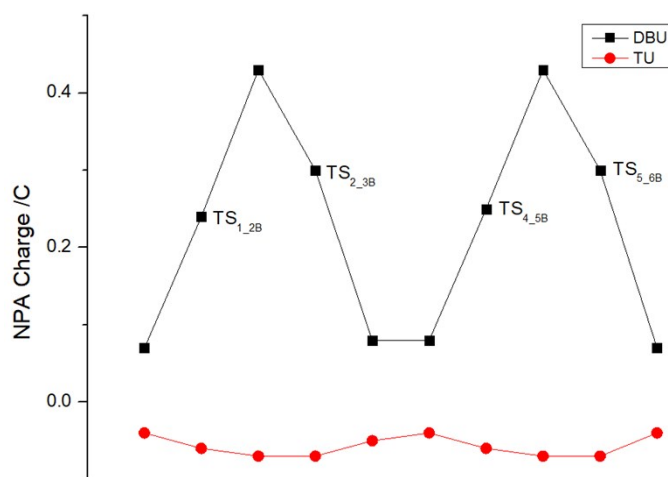

**Fig. S6** Changes in NPA charge on DBU (black curve) and TU (red curve) in ternary DBU/TU/BnOH system.
